# Supplementary material
Source: PubMed Central journal article supplement (PMC2844320)
Supplement: supp_123_7_1116__4.pdf [file supp_123_7_1116__4.pdf]

**Table S1: PCR primers**

|     |                                  |
|-----|----------------------------------|
| #1  | GCGGCCGCATGCCAGGCGCTGACTACAGTGCT |
| #2  | GGTACCCAATATCGATCAGATTTTCATTTTC  |
| #3  | GCAGGTGGCGAGAGCGAAACATTTGGAGGA   |
| #4  | GGTACCTTTTTGAAGTTTTCTGCAATAAAA   |
| #5  | CCACTCCAACATATCTTCCG             |
| #6  | CATATGCCAGGCGCTGACTACAGTGC       |
| #7  | CTCGAGACAATATCGATCAGATTTTCATTT   |
| #8  | CATATGGCCGAGTACTCCTATGTGAAG      |
| #9  | CTCGAGCTTGCAGTATCTGTCTGGCTTTC    |
| #10 | GCGGCCGCATGGAACGTGTGACCGTTCG     |
| #11 | GGTACCCACCATGATCTCACATTTGA       |
