# Supplementary material
Source: PubMed Central journal article supplement (PMC2844320)

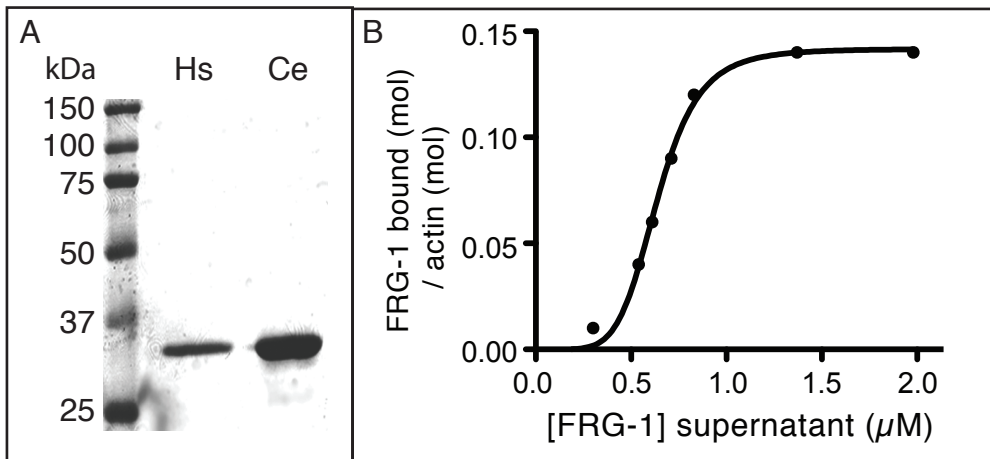

Supplement: supp_123_7_1116__1.pdf [file supp_123_7_1116__1.pdf]

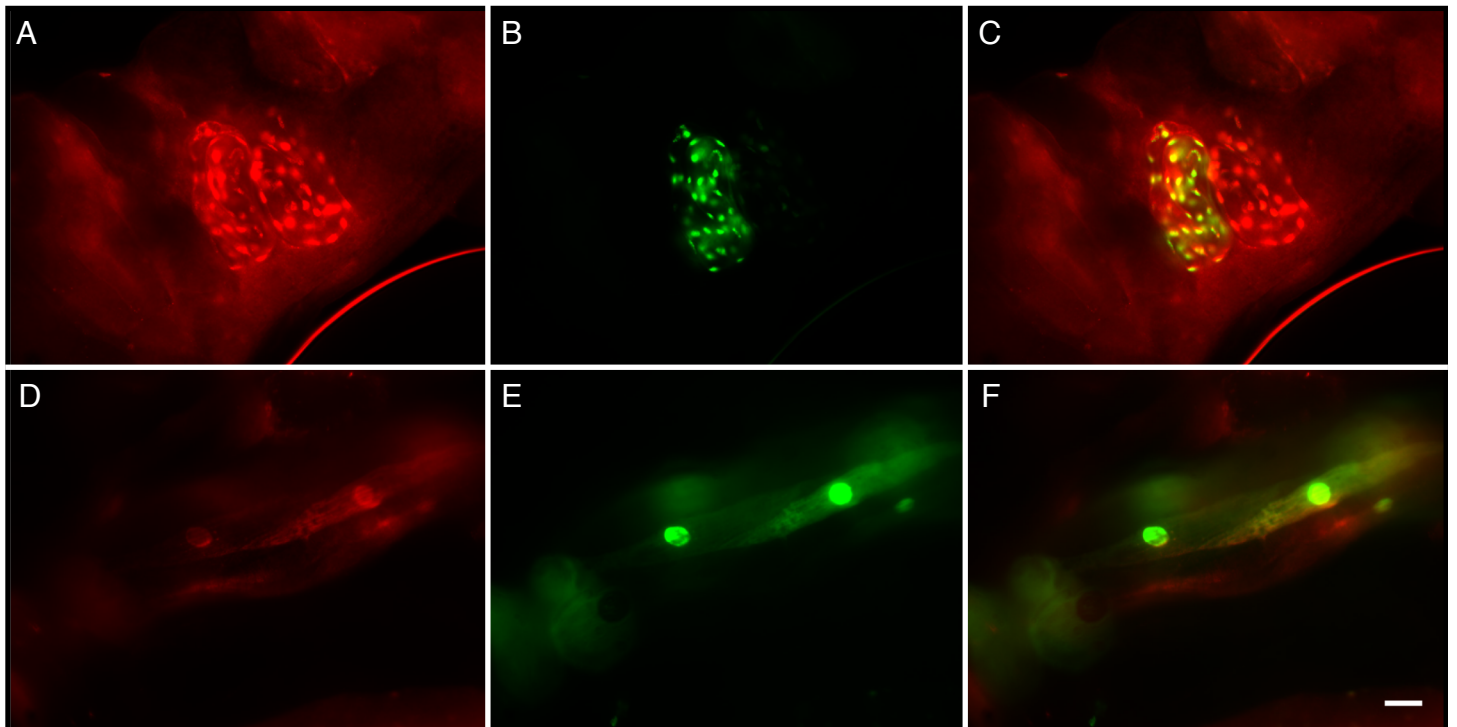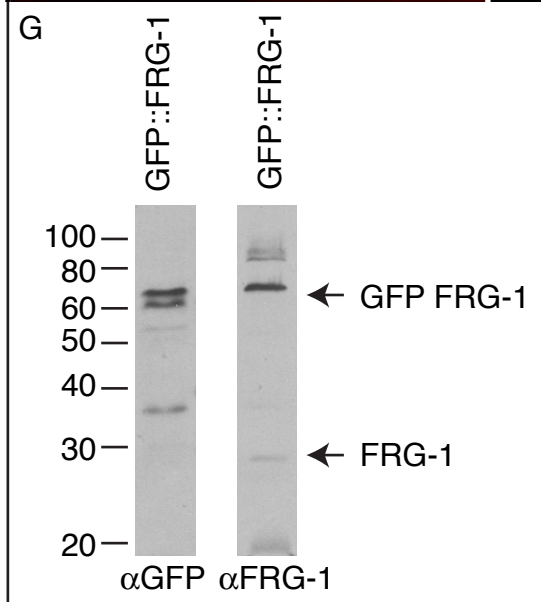

Supplement: supp_123_7_1116__2.pdf [file supp_123_7_1116__2.pdf]

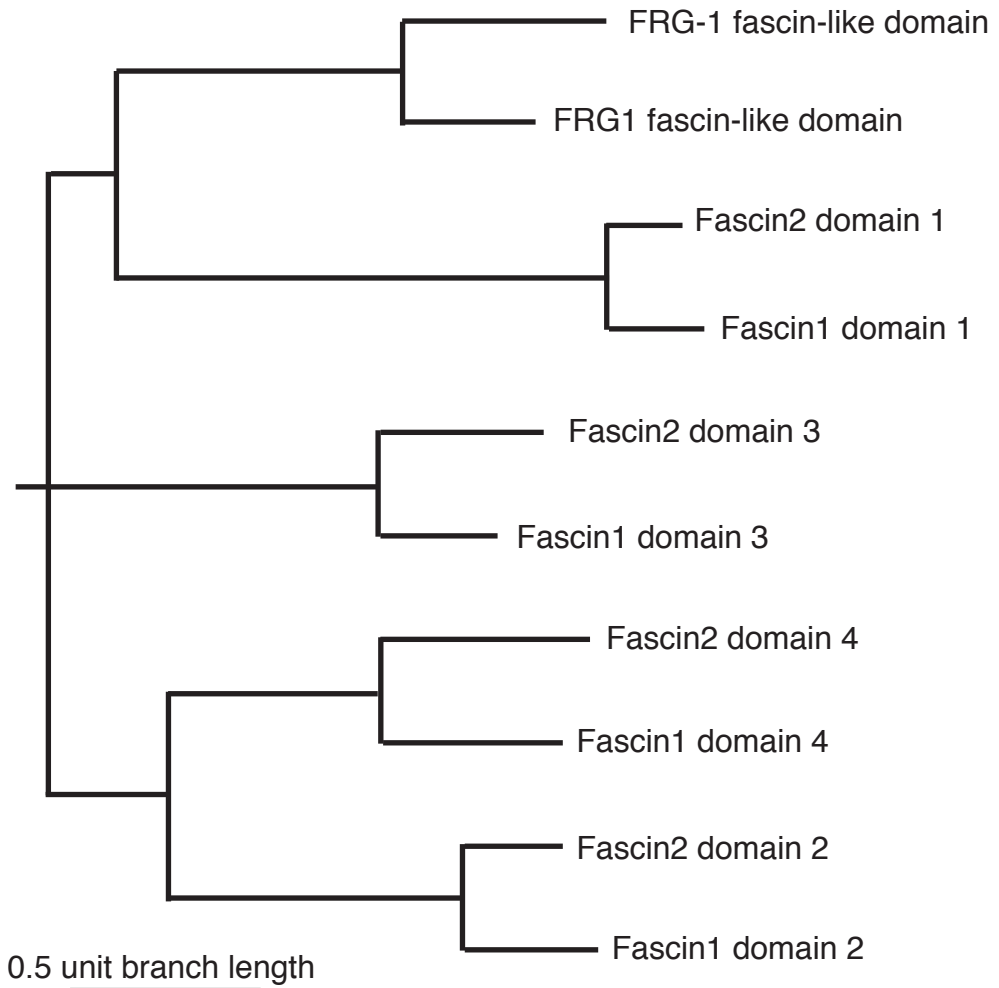

Supplement: supp_123_7_1116__3.pdf [file supp_123_7_1116__3.pdf]
